# Supplementary material for: SLC31A1 Identifying a Novel Biomarker with Potential Prognostic and Immunotherapeutic Potential in Pan-Cancer
Source: MDPI journal article supplement (doi:10.3390/biomedicines11112884), 2023-10-25
Supplement: s1 [file s1]

## Supplementary Material

### 1.1 Supplementary Figures

Figure S1

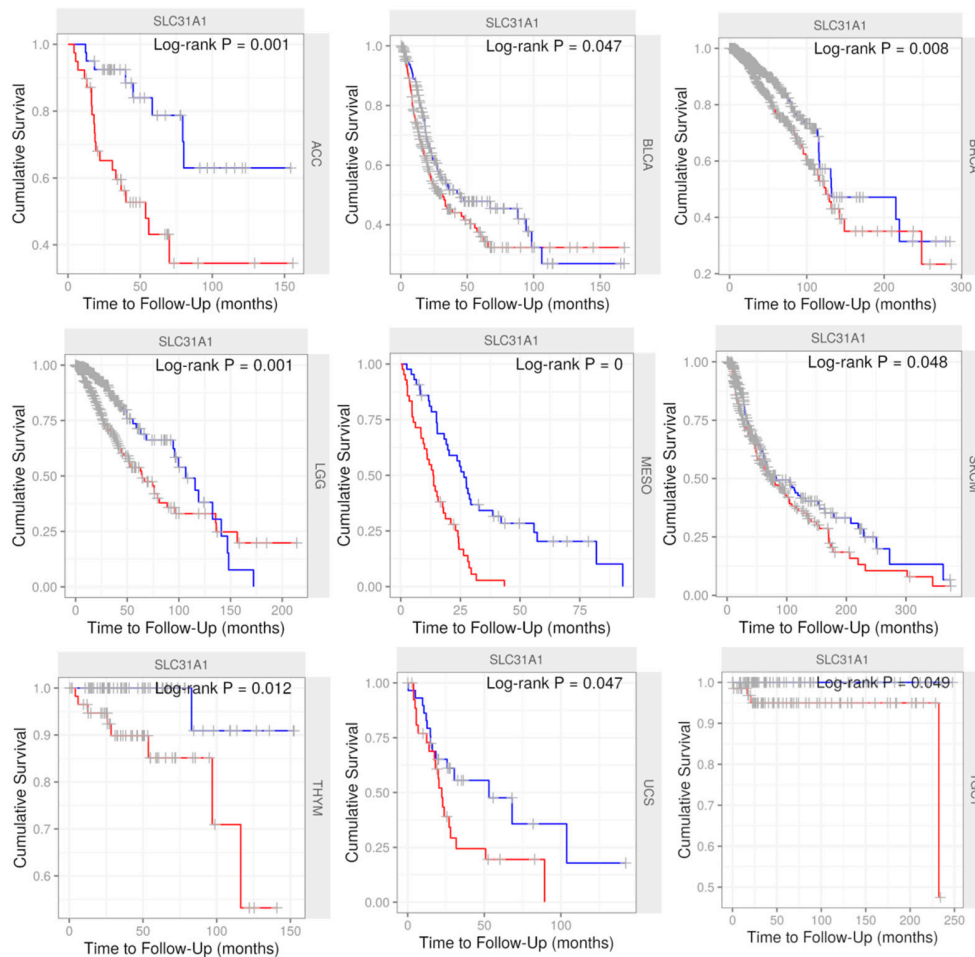

**Supplementary Figure S1.** Expression of and overall survival in cancer patients. OS Kaplan-Meier survival curves stratified by the varied expressions in ACC, BLCA, BRCA, LGG, MESO, SKCM, THYM, UCS, TGCT.

Figure S2

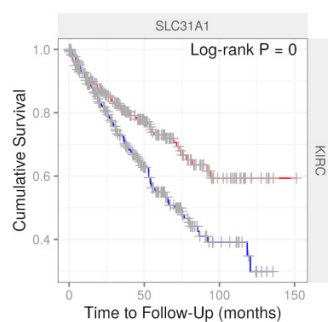

**Supplementary Figure S2.** Expression of and overall survival in cancer patients. OS Kaplan-Meier survival curves stratified by the varied expressions in KIRC.

Figure S3

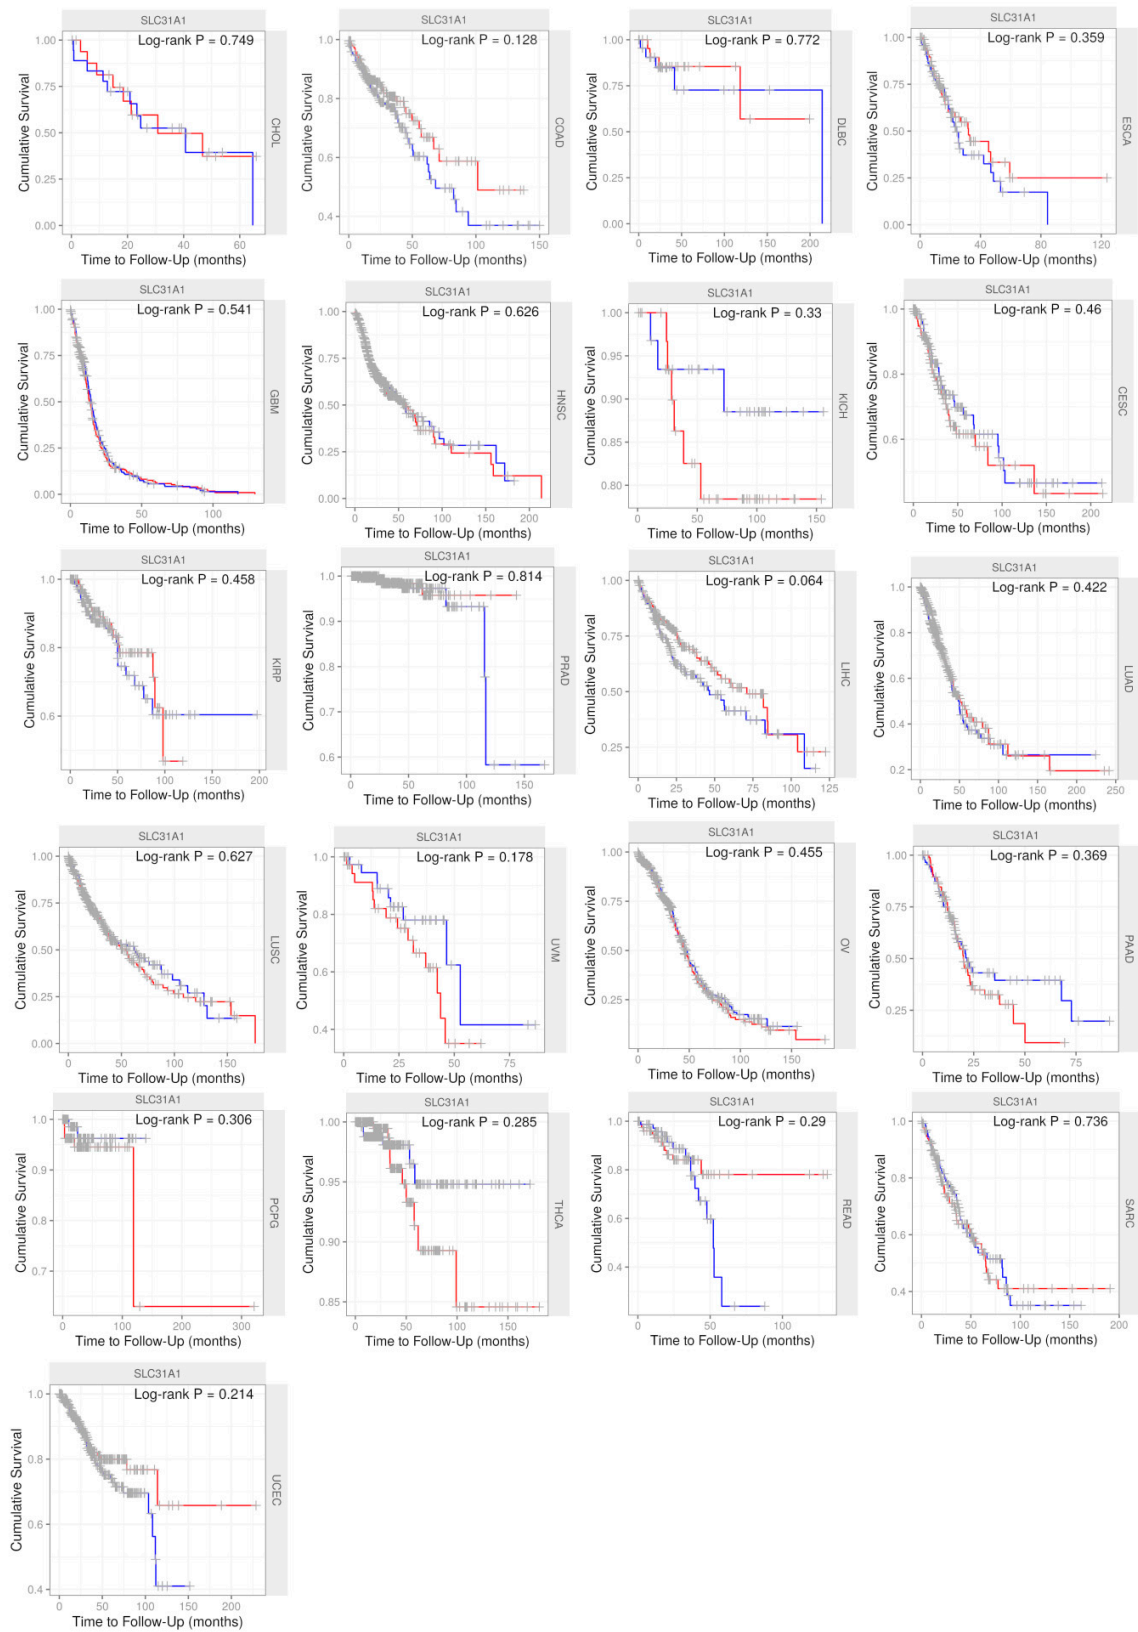

**Supplementary Figure S3.** Expression of and overall survival in cancer patients. OS Kaplan-Meier survival curves stratified by the varied expressions in CHOL, COAD, DLBC, ESCA, GBM, HNSC, CESC, KICH, KIRP, LIHC, LUAD, LUSC, UVM, OV, PAAD, PCPG, PRAD, THCA, READ, SARC, UCEC.
